# Supplementary material for: Short-term memory in gene induction reveals the regulatory principle behind stochastic IL-4 expression
Source: PubMed Central journal article supplement — Mol Syst Biol. 2010 Apr 13;6:359. doi: 10.1038/msb.2010.13 (PMC2872609; doi:10.1038/msb.2010.13), 2010-04-13
Supplement: msb201013-s2.pdf [file msb201013-s2.pdf]

**Supplementary information for: Short-term Memory in Gene Induction Reveals the  
Regulatory Principle behind IL-4 Stochastic Expression**

**Author: Luca Mariani et al.**

**Table of Contents**

- **Mathematical appendix 1: Post-transcriptional memory time**
- **Mathematical appendix 2: Transcription factor activity and occupancy of the binding site**
- **Mathematical appendix 3: Fraction and mean expression value of IL-4 positive cells**
- **Supplementary figures legends**
- **Supplementary information references**
- **Figure S1**
- **Figure S2**
- **Figure S3**
- **Figure S4**
- **Figure S5**
- **Figure S6**
- **Figure S7**
- **Figure S8**
- **Figure S9**
- **Figure S10**
- **Figure S11**
- **Figure S12**
- **Figure S13**
- **Figure S14**
- **Figure S15**

## Mathematical appendix 1

### Post-transcriptional memory time

To understand the effect of mRNA degradation and protein secretion on the memory time of IL-4 expression, we consider the model presented in figure 2B of the main text; which includes only mRNA production-degradation, and protein translation-secretion:

$$\begin{aligned}\frac{dmRNA}{dt} &= k_R - d_R mRNA \\ \frac{dPROTEIN}{dt} &= k_p mRNA - d_p PROTEIN\end{aligned}\tag{Eq. S1.1}$$

When the reactions happen stochastically, the model can be treated with two main approaches: the master equation, or the Langevin approach.

In the master equation approach, the system has a discrete number of states corresponding to the absolute values of the considered chemical compounds, and the system jumps between these states with a certain probability depending on the reaction rates [1]. When mRNA and proteins are considered separately, they follow a poissonian distribution, with the variance equal to the mean. In the mRNA case this leads to:

$$Var_{mRNA} \equiv \langle mRNA^2 \rangle - \langle mRNA \rangle^2 = \langle mRNA \rangle = k_R / d_R\tag{Eq. S1.2}$$

Conversely, in case that the mRNA is constant, the protein distribution verifies:

$$Var_{PROTEIN} \equiv \langle PROTEIN \rangle = k_R k_p / d_R d_p\tag{Eq. S1.3}$$

When both of the compounds vary stochastically, the protein variance is perturbed by the upstream mRNA fluctuations [2], giving a variance:

$$Var_{PROTEIN} \equiv \langle PROTEIN \rangle \left(1 + \frac{k_p}{d_p + d_R}\right)\tag{Eq. S1.4}$$

which leads to the Eq.1 in the main text, in which variance is normalized and  $\tau_R \equiv d_R^{-1}$ ,  $\tau_p \equiv d_p^{-1}$  are mRNA and protein averaged lifetimes.

In the Langevin approach, the system varies continuously in the space of the chemical compounds of mRNA and proteins. Then, random fluctuations are imposed to the kinetics of

the compounds by adding noise functions  $\eta_{mRNA}, \eta_{PROTEIN}$  which perturb the equations of motion:

$$\begin{aligned} \frac{dmRNA}{dt} &= k_R - d_R mRNA + \eta_{mRNA}(t) \\ \frac{dPROTEIN}{dt} &= k_P mRNA - d_P PROTEIN + \eta_{PROTEIN}(t) \end{aligned} \quad (\text{Eq. S1.5})$$

In the case of white noises, the fluctuations are in average equal to zero and not correlated in time:

$$\begin{aligned} \langle \eta_{mRNA}(t) \rangle &= 0, \quad \langle \eta_{mRNA}(t) \eta_{mRNA}(t+\tau) \rangle = q_R \delta(\tau) \\ \langle \eta_{PROTEIN}(t) \rangle &= 0, \quad \langle \eta_{PROTEIN}(t) \eta_{PROTEIN}(t+\tau) \rangle = q_P \delta(\tau) \end{aligned} \quad (\text{Eq. S1.6})$$

where  $\delta(\tau)$  is a Dirac-function, and the fluctuations depends just on the parameters  $q_R, q_P$ .

The Langevin approach is consistent with the master equation when the gain-loss terms within the differential equations are linear, and the variance due to the noise functions  $\eta$  matches the variance obtained from the Master Equation. In the case of mRNA, the variance in the Langevin approach can be computed for the deviations from the steady-state,

$\delta R = mRNA - \langle mRNA \rangle$ , by using the Fourier transform  $x(t) = \int e^{i\omega t} x(\omega) d\omega / 2\pi$ , as in [3]:

$$\langle |\eta_{mRNA}(\omega)|^2 \rangle = q_R, \quad \delta R(\omega) = \frac{\eta_{mRNA}(\omega)}{d_R + i\omega} \quad (\text{Eq. S1.7})$$

From the mRNA variance:

$$VAR_{mRNA} \equiv \langle \delta R^2 \rangle = \int \frac{d\omega}{2\pi} \frac{q_R}{d_R^2 + \omega^2} = \frac{q_R}{2d_R} \quad (\text{Eq. S1.8})$$

and the ‘‘poissonian’’ constraint on the white noise intensity,  $VAR_{mRNA} = \langle mRNA \rangle = k_R / d_R$ , it follows  $q_R = 2k_R$ .

To derive the value of  $q_P$ , a similar method is applied to the protein dynamics, while the mRNA is considered deterministic ( $\eta_R = 0$ ), resulting in  $q_P = 2k_P k_R / d_R$ .

When the two noises are both present, the protein variance is perturbed as described by the master equation:

$$VAR_{PROTEIN} = \int \frac{d\omega}{2\pi} \frac{q_P}{d_P^2 + \omega^2} \left(1 + \frac{k_P^2 q_R}{d_R^2 + \omega^2}\right) \langle PROTEIN \rangle \left(1 + \frac{k_P}{d_P + d_R}\right) \quad (\text{Eq. S1.9})$$

equal to the variance in Eq. 1.4, obtained by Master Equation.

Following Sigal and colleagues [4], the memory time of a certain component x can be defined as the half-time of the normalized autocorrelation function  $A_x$ :

$$A_x(t_1) = \frac{\langle \delta x(t) \delta x(t + t_1) \rangle}{\langle \delta x(t)^2 \rangle} = 0.5 \quad (\text{Eq. S1.10})$$

In the case of mRNA, the solution of  $\delta R$  reads:

$$\frac{d\delta R}{dt} = -d_R \delta R + \eta_{mRNA}(t); \quad \delta R(t) = \int_{-\infty}^t e^{d_R(t'-t)} \eta_{mRNA}(t') dt' \quad (\text{Eq. S1.11})$$

Then, the normalized autocorrelation function of mRNA is:

$$\begin{aligned} A_R(\tau) &= \langle \int_{-\infty}^t e^{d_R(t'-t)} \eta_{mRNA}(t') dt' \int_{-\infty}^{t+\tau} e^{d_R(t''-t-\tau)} \eta_{mRNA}(t'') dt'' \rangle / VAR_{mRNA} = \\ &= e^{-d_R(2t+\tau)} \int_{-\infty}^t e^{d_R t'} \int_{-\infty}^{t+\tau} e^{d_R t''} 2d_R \delta(t'-t'') dt'' dt' = e^{-d_R \tau} \end{aligned} \quad (\text{Eq. S1.12})$$

Considering the estimated mRNA degradation rate for IL-4 (see Table 1), the memory time for mRNA is equal to  $t_{\frac{1}{2}mRNA} \cong 1hr$ .

Similarly, random variations in protein production, coupled to mRNA fluctuations, follow:

$$\begin{aligned} \frac{d\delta P}{dt} &= k_P \delta R - d_P \delta P + \eta_{PROTEIN}(t) \\ \delta P(t) &= \int_{-\infty}^t e^{d_P(t'-t)} \left\{ \eta_{PROTEIN}(t') + \int_{-\infty}^{t'} e^{d_R(t''-t')} \eta_{mRNA}(t'') dt'' \right\} dt' \end{aligned} \quad (\text{Eq. S1.13})$$

with an autocorrelation function for protein levels equal to:

$$A_P(\tau) = \frac{d_R d_P k_P}{(d_P - d_R)(d_R + d_P + k_P)} \left( \frac{e^{-d_R \tau}}{d_R} - \frac{e^{-d_P \tau}}{d_P} \right) + \frac{d_R + d_P}{k_P + d_R + d_P} e^{-d_P \tau} \quad (\text{Eq. S1.14})$$

In the case of IL-4, the estimate for the parameters ( $d_P = 2d_R$ ;  $k_P / d_R > 10^2$ ) leads to the following approximation:

$$A_P(\tau) \cong 2e^{-d_R \tau} - e^{-d_P \tau} \quad (\text{Eq. S1.15})$$

Considering our estimate of the rates of protein secretion and mRNA degradation for IL-4 (Table 1), the theoretical memory time for IL-4 protein, if it would obey the model in Fig 1B, is equal to

$$t_{\frac{1}{2} \text{PROTEIN}} = 1.75 \text{hr} \quad (\text{Eq. S1.16})$$

## Mathematical appendix 2

### Transcription factor activity and occupancy of the binding site.

In the model in Fig 2C, the effect of the transcription factor activity on the gene regulation depends on the occupancy of the stimulation-dependent transcription factor ( $TF$ ) at one specific binding site (BS).

The binding and the release of  $TF$  at the site is described by a simple mass action kinetics

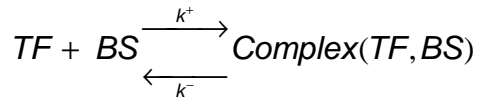

where  $k^+$  and  $k^-$  are the rates of binding and release respectively. The average time for a complex is equal to  $B = 1/k^-$ , while the average time in which the binding site is not bound by a  $TF$  is  $N = 1/(TFk^+)$ .

In the approximation of rapid equilibrium for  $TF$  binding-release, the occupancy of the site can be written as

$$O_{TF}(t) = \frac{B}{N + B} = \frac{TF(t)}{K_D + TF(t)} \quad (\text{Eq. S2.1})$$

where  $TF(t)$  is the kinetics of the  $TF$  concentration and  $K_D = \frac{k^-}{k^+}$  is the dissociation constant.

For values of  $TF$  which do not saturate the occupancy of the binding site ( $K_D \gg TF(t)$ ),

the occupancy in Eq. 2.1 is proportional to the transcription factor  $TF$

$$O_{TF}(t) \cong \frac{TF(t)}{K_D} \quad (\text{Eq. S2.2})$$

Since  $O_{TF}(t)$  is a multiplicative factor for the reactions of chromatin opening and mRNA transcription (Fig 2D), it can be arbitrarily re-scaled coordinatively with  $k_G$  and  $k_R$ . In the simulations presented in Fig. 2E, 3 and 6, the occupancy was rescaled relatively to the maximal value  $O_{TF}(0) \equiv O_{TF}^{MAX} = 1$ . In the simulations presented in Fig. 5, the value of  $O_{TF}^{MAX}$  was a free parameter in order to assess the effect of different values of TF activity on the gene expression.

### Mathematical appendix 3

#### Fraction and mean expression value of IL-4 positive cells

To have analytical approximation on the fraction and the mean expression level of IL-4 positive cells on a population level, we considered just the initial constant phase of the kinetics for TF occupancy at the binding site  $O_{TF}(t)$ . This phase is equal to a step function with phase  $t_A$ :

$$\begin{aligned} \text{for } 0 < t < t_A, \quad O_{TF}(t) &= O_{TF}^{Max} \\ \text{for } t > \tau, \quad O_{TF}(t) &= 0 \end{aligned} \quad (\text{Eq. S3.1})$$

Assuming that the binding site occupancy of the transcription factor switches off randomly and completely with probability rate  $\delta_{TF}$ , the probability  $S(t)$  of finding the cell with  $O_{TF} = 0$  evolves as

$$\frac{dS}{dt} = \delta_{TF}(1 - S) \quad (\text{Eq. S3.2})$$

For a starting value  $S(0) = 0$ , the solution becomes

$$S(t) = 1 - e^{-\delta_{TF}t}. \quad (\text{Eq. S3.3})$$

and the probability distribution  $D_{TF}(t)$  for a cell to have a phase  $t$  is equal to:

$$D_{TF}(t) = \frac{dS}{dt} = \delta_{TF} e^{-\delta_{TF} t} . \quad (\text{Eq. S3.4})$$

The mean phase of TF binding site occupancy,  $\langle t_A \rangle$ , can be calculated as the expectation value of the each phase  $t_A$  over the probability distribution  $D_{TF}(t)$  from Eq. S3.4:

$$\langle t_A \rangle \equiv \int_0^{\infty} t_A D_{TF}(t_A) dt_A = \delta_{TF}^{-1} \quad (\text{Eq. S3.5})$$

Assuming that all genes are initially in the closed state, and they get opened in a single step with probability rate  $\kappa_G O_{TF}(t)$ , the probability  $G(t)$  of a gene to open, evolves as:

$$\frac{dG}{dt} = \kappa_G O_{TF}(t)(1-G) \quad (\text{Eq. S3.6})$$

and, depending on the phase  $\tau$ , it is given by :

$$\begin{aligned} \text{for } t < \tau, \quad G(t) &= (1 - e^{-\kappa_G O_{TF}^{Max} t}) \\ \text{for } t > \tau, \quad G(t) &= (1 - e^{-\kappa_G O_{TF}^{Max} \tau}) \end{aligned} \quad (\text{Eq. S3.7})$$

Similarly to Eq. S3.4, for a cell with a phase  $\tau$ , the probability distribution of the time elapsing from the beginning of the phase ( $t=0$ ) to the opening of the gene  $D_{ON}(t)$  is:

$$\begin{aligned} \text{for } t < \tau, D_{ON}(t) &= \frac{dG}{dt} = \kappa_G O_{TF}^{Max} e^{-\kappa_G O_{TF}^{Max} t} \\ \text{for } t > \tau, D_{ON}(t) &= \frac{dG}{dt} = 0 \end{aligned} \quad (\text{Eq. S3.8})$$

The fraction of opened genes at the end of the stimulation  $\rho_+$  can be calculated as the probability to find a gene with a certain occupancy phase, distributed as  $D_{TF}(\tau)$ , activated within that phase  $G(\tau)$ , and using Eq. S3.4 and Eq. S3.7

$$\rho_+ \equiv \int_0^{\infty} D_{TF}(\tau) G(\tau) d\tau = \frac{\langle t_A \rangle \kappa_G O_{TF}^{Max}}{1 + \langle t_A \rangle \kappa_G O_{TF}^{Max}} . \quad (\text{Eq. S3.9})$$

Assuming that the the transcription rate for a closed gene is 0, while it depends on the binding site occupancy as  $\kappa_R O_{TF}(t)$  for the open genes, the amount of mRNA molecules produced during a stimulation depends on the trascription phase, namely the time lapse between the gene opening and the end of the binding site occupancy. For a gene with occupancy phase  $\tau$ , the mean transcription phase  $\varphi(\tau)$  comes from the opening distribution  $D_{ON}(t)$  in Eq. S3.8 as:

$$\varphi(\tau) \equiv \int_0^{\infty} D_{on}(t)(\tau-t) dt = \int_0^{\tau} \kappa_G O_{TF}^{Max} e^{-\kappa_G O_{TF}^{Max} t} (\tau-t) dt = \tau - \frac{1 - e^{-\kappa_G O_{TF}^{Max} \tau}}{\kappa_G O_{TF}^{Max}} \quad (\text{Eq. S3.10})$$

The mean transcription phase of the population,  $\varphi_{Total}$ , is equal to the expectation value of  $\varphi(\tau)$  over the distribution of the occupancy phase  $D_{TF}(\tau)$ , and explicitly solved as:

$$\varphi_{Total} \equiv \int_0^{\infty} D_{TF}(\tau) \varphi(\tau) d\tau = \langle t_A \rangle = \frac{\langle t_A \rangle \kappa_G O_{TF}^{Max}}{1 + \langle t_A \rangle \kappa_G O_{TF}^{Max}}. \quad (\text{Eq. S3.11})$$

To calculate the mean transcription phase of an opened gene  $\varphi_+$ , we rescale  $\varphi_{Total}$  with the fraction of opened genes at the end of the stimulation:

$$\varphi_+ \equiv \frac{\varphi_{Total}}{\rho_+} = \langle t_A \rangle. \quad (\text{Eq. S3.12})$$

The mean amount of protein produced by an opened gene,  $\langle PROTEIN \rangle_+$ , is indeed proportional to its mean transcription time  $\varphi_+$ , to the transcriptional rate  $O_{TF}^{Max} \kappa_R$  and to the translational efficiency  $\frac{k_P}{\delta_R}$ :

$$\langle PROTEIN \rangle_+ = O_{TF}^{Max} \kappa_R \langle t_A \rangle = \frac{k_P}{\delta_R}. \quad (\text{Eq. S3.8})$$

## Supplementary figures legends

**Supplementary Figure S1.** Determination of the distribution for intracellular IL-4 positive cells.

(A) The mean fluorescence intensity (MFI) of the staining is the algebraic mean of the fluorescence intensity distribution and  $\sigma$  is its standard deviation; in the depicted example  $MFI(IL-4)=26AU$  and  $\sigma(IL-4)=32AU$ . Typically, the distribution of the isotype antibody, which is used to detect the background auto-fluorescence, is shaped as the lower peak of the detection antibody distribution; in the depicted example  $MFI(ISO)=5AU$  and  $\sigma(ISO)=1.9AU$ . The normalized variance,  $v = (\sigma/MFI)^2$ , is computed and presented for the two distributions.

(B) To determine the exact percentage of IL-4 positive cells, the distribution of the isotype control (black curve) is re-scaled to overlap the lower peak of the normalized distribution of the detection IL-4 antibody (red curve). The overlapping area of the two distributions determines the fraction of cells which do not express IL-4, and the complementary area of the



IL-4 distribution quantifies the positive ones; in the depicted example 60% and 40% respectively.

(C) MFI, standard deviation and normalized variance of the positive cells are determined from the complementary area derived above (B).

**Supplementary Figure S2.** Accumulation rate of extracellular IL-4 peaks after ~4 hours from the beginning of the stimulation.

IL-4 accumulation kinetics in the supernatant was measured by ELISA upon re-stimulation with PMA/Ionomycin in wild-type Th2 cells. All measurements were normalized to the final accumulation value of each stimulation. For each single kinetics, the relative accumulation rate was determined as the increase in the normalized accumulation of extracellular IL-4 at each hour. Mean and standard deviation of 6 kinetics are presented.

**Supplementary Figure S3.** Estimation of the kinetics rates.

(A) To estimate experimentally  $\tau_R$ , we used the kinetics of relative IL-4 mRNA upon stimulation that is also presented in Figure 1B (red circles). If mRNA degradation is not regulated but happens because of random encounters with specific enzymes ( $-d_R * mRNA$ ), the mRNA lifetime distribution  $D_{mRNA}(t) = e^{-d_R t}$  gives an average lifetime of mRNA equal to

$$\tau_R \equiv \int_0^{\infty} t D_{mRNA}(t) dt = d_R^{-1} \text{ and the mean value of mRNA molecules decays as } e^{-d_R t}.$$

Then,  $\tau_R$  is the time needed by mRNA to decrease of a factor  $e^{-1} = 0.37$  from its original value. An upper bound for the mRNA life time can be estimated from the decay time after the peak of the response, which is reached at hour 3. Since the mRNA relative signal takes ~120 minutes to decay from 1 to 0.37, 120 minutes would be the life time if mRNA production would stop abruptly after reaching the peak. Since such homogenous behavior in the population is unlikely, the true half-life most likely lies below this value. Analysis of later time points, when most cells have stopped transcription, yields the more realistic value between 90 and 60 minutes. These values are in agreement with previous reports [5], and we fixed an mRNA life time of 90 minutes for all the simulation and the model analysis.

(B) As in the mRNA case presented above, we assumed that protein secretion happens randomly ( $-d_p * PROTEIN$ ), resulting in a protein average lifetime equal to

$\tau_p \equiv \int_0^{\infty} t e^{-d_p t} dt = d_p^{-1}$ . To estimate  $\tau_p$ , we also used the data presented in Fig. 1B. We fitted

the mRNA data with a spline (MatLab), which we used to fit the protein secretion rate to the kinetics of intracellular and secreted protein. In the fitting procedure, we used a model, where protein is produced in linear proportion to the mRNA level and secretion is described as a first-order process. The average protein kinetics is the solution of  $\frac{d \langle PROTEIN \rangle}{dt} = k_p \langle mRNA \rangle - d_p \langle PROTEIN \rangle$ . The best fit was found for a

secretion rate of  $d_p = 1.4 \text{ hour}^{-1}$ , resulting in an average lifetime for intracellular protein of ~45 minutes. Profile-likelihood method [6] was used to find the 95% confidence interval (35min ,60min). In this method, for a parameter of interest  $h$  the log-increase  $\phi(h)$  of the mean-square objective function  $F(h)$ , relative to the parameter minima  $F(h_{\min})$ , is calculated and rescaled to the number of fitting points ( $n$ ) and the 95<sup>th</sup> quantile of the  $\chi^2$ -distribution for one degree of freedom ( $\chi^2_{1,0.95}=3.841$ ). As  $\phi(h) = n |\ln(F(h) - \ln(F(h_{\min}))| / \chi^2_{1,0.95}$  reach the value 1, the 95<sup>th</sup> confidence interval is found.

**Supplementary Figure S4.** Data best-fitting for the values of the model parameters  $k_G$ ,  $d_G$  and  $\langle t_A \rangle$ .

(A) To find the best-fitting values of  $k_G$ ,  $d_G$  and  $\langle t_A \rangle$  we compared the distributions of IL-4 positive cells from 2-weeks-differentiated wildtype Th2 cells (obtained as described in Fig. S1) with 5000 simulated cells with a conversion factor from protein number to fluorescence intensity of  $10^{-3.7}$ . We defined an objective function as the ordinary least-squares function of the positive fraction, mean fluorescence intensity and relative standard deviation at hour 2, 3, 4, and 6 between the considered distributions (12 values in total). With a simulated-annealing algorithm, we obtained values for  $k_G$  and  $t_A$  normally distributed (Lilliefors test). Profile-likelihood method, as described in Fig. S3B, confined the parameters in the region  $k_G = (0.16, 0.4) \text{h}^{-1}$  and  $\langle t_A \rangle = (1.1, 1.5) \text{h}$  [6].

(B) Since  $d_G$  was not normally distributed and varied over several order of magnitude, we fixed it to an intermediate mean value,  $0.02 \text{h}^{-1}$ , and we varied systematically  $k_G$  and  $\langle t_A \rangle$  in the best-fit region. The minimum of the objective function were found for  $k_G = 0.23 \text{h}^{-1}$  and

$\langle t_A \rangle = 1.3$ . The profile-likelihood based method was used to compute the 95% confidence intervals of the maximum likelihood parameter estimates, see Fig. S3B. The 95% confidence interval are  $k_G = (0.2, 0.27)h^{-1}$  and  $\langle t_A \rangle = (1.2, 1.42)h$ .

(C) We applied the profile-likelihood method to estimate the upper bound for  $d_G = 0.06h^{-1}$ .

**Supplementary Figure S5.** Short-term memory in IL-4 induction is cell-cycle independent.

(A) 1-week-differentiated  $il4^{wt}/il4^{gfp}$  Th2 cells were labeled with the proliferation cell marker DDAO and stimulated with anti-CD3/28 and costimulatory signals for 24 hours, and then rested, as described in Fig 4A. Either 3 or 5 days after first stimulation a fraction of cells were stimulated for 4 hours a second time with PMA/Ionomycin/BfA and stained for intracellular IL-4. As the cell divides, the two daughter cells exhibit a halved fluorescence intensity of the DDAO marker; therefore the level of cell proliferation is inversely correlated with the level of DDAO (see “Cell proliferation” arrow). Left panels: Intracellular IL-4 versus DDAO, measured by flow-cytometry, show that there is no correlation between IL-4 expression and cell proliferation in early (A) and late (B) second stimulations (Corr.Coef. $<0.05$ ). IL-4 expressing and non-expressing cells are outlined with red and blue dotted gates. Right panels: distributions of DDAO from IL-4 expressing (red line) and non-expressing (blue line) cells exhibit similar fluorescence profile. As high control for the DDAO labeling, resting cells at day 1 were measured (Black line, Day1). As low control, an aliquot of cells were left DDAO-unlabeled (grey shadow, no DDAO) and treated equally as the cells labelled with DDAO. One representative experiment out of two is shown.

**Supplementary Figure S6.** IL-4 Secretion assay.

1-week-differentiated  $il4^{wt}/il4^{gfp}$  Th2 cells were stimulated with anti-CD3/28 for 3.5h and the IL-4 secretion assay was performed. Right before the secretion phase, an aliquot of cells was removed and stored on ice (A, low control). To test for homogeneous matrix labeling, another

aliquot was incubated at a high cell density with recombinant IL-4 (30 ng/ml) at 37°C for 30 min (B, high control). The remaining cells were incubated at a low cell density for 30 min at 37°C (C). Surface-bound IL-4 was stained with a PE-conjugated antibody. Through cytometry sorting the positive (D) and the negative (E) fractions were purified. To assure that surface labeling resulted from IL-4 expression in the same cell an aliquot of cells was fixed with formaldehyde before the sorting step (F+G). These cells were stained for intracellular IL-4 with an APC-coupled antibody (F), to test specificity of the staining, in parallel it was performed in the absence of saponin (G).

**Supplementary Figure S7.** The sorted IL-4 positive and negative populations do not express IL-4 after the stimulation period.

1-week-differentiated *il4<sup>wt</sup>/il4<sup>gfp</sup>* Th2 cells were stimulated, sorted for IL-4 and rested (see “Material and methods” in the main text). 24 hours after the termination of the stimulation, sorted IL-4 positive (red line) and negative (blue line) cells were stained for intracellular IL-4, and for isotype control (grey shadow).

**Supplementary Figure S8.** The IL-4 capture matrix on the cell surface interfered with the IL-4 intracellular staining for 2 days after the secretion assay.

Before the secretion assay (Fig. 4C and S6) some cells were removed and not labeled with the IL-4 capture matrix (unlabeled), but were otherwise treated identically to the rest of the cells (labeled). After the secretion phase and the surface IL-4 staining, cells were sorted, and then further stimulated and rested as described in Fig. 4C. The labeled, unlabeled, positive sorted, and negative sorted cells were stimulated 1, 2 or 3 days, as indicated, after the stimulation period. Stimulation was assessed for 4 hours with PMA/Ionomycin/BfA in the presence of the IL-4 specific antibody (24G2, 100µg/ml) that reduces the binding of IL-4 to the capture matrix present on the cell surface. After stimulation, the cells were fixed for intracellular staining and incubated with unlabeled IL-4 specific antibody (11B11) to saturate surface-bound IL-4. Then IL-4 was stained intracellularly with an APC-labeled IL-4 antibody (11B11,

BD) or with an isotype control antibody. At day 1 and 2 the staining signal was stronger in the labeled fraction compared to the unlabeled cells, although these samples should produce the same amount of IL-4, indicating that IL-4 on the cell surface bound to the capture matrix interfered with the intracellular staining (compare green and black lines). Therefore the capture matrix also resulted in a staining background in the sorted cells relative to the isotype controls (compare blue/red and grey) and intracellular staining could not be used at day 1 and 2 to compare IL-4 production in the positive and the negative fraction.

**Supplementary Figure S9.** Sorted IL-4 negative cells have similar probability of IL-4 induction than parental cells (Day0), and lower than the sorted IL-4 positive cells.

1-week-differentiated *il4<sup>wt</sup>/il4<sup>gfp</sup>* Th2 cells were stimulated for 3.5 hours with CD3/CD28-specific antibodies, and IL-4 positive and negative cells were purified using the IL-4 secretion assay, followed by flow cytometric sorting. Sorted IL-4 positive and negative cells were further stimulated for an additional 20 hours and rested (see “Material and methods” of the main text). After 3, 4 or 5 days in resting conditions, the cells were re-stimulated with PMA/Ionomycin/BfA, and IL-4 production was measured by intracellular staining followed by flow cytometry. The percentage of IL-4 producing cells in each population was quantified as described in Fig. S1. Left panels: IL-4 expression profiles for five independent repetitions (exp.1-5) are presented and used for statistical analysis of the results. Right panel: For each single repetition, the percentage of IL-4 positive cells at day 3, day 4, and day 5, relative to the value at day 0, are presented and used to compute the statistical mean and standard deviation presented in Fig 4C. By applying a t-test, significant differences were found among the sorted IL-4 positive cells at different days (Matlab, P-value<0.05), and between the sorted IL-4 positive and negative at different days. On contrary, the sorted IL-4 negative cells were not significantly different (Matlab, P-value<0.05) from a normal distribution with mean value 1, which is the reference value of day 0.

**Supplementary Figure S10.** In the first days after the initial stimulation, IL-4 extracellular accumulation was higher in the sorted IL-4 positive population than in the negative population.

1-week-differentiated *il4<sup>wt</sup>/il4<sup>gfp</sup>* Th2 cells were stimulated for 3.5 hours with CD3/CD28-specific antibodies, and IL-4 positive and negative cells were purified using the IL-4 secretion assay, followed by flow cytometric sorting (see fig.S6). Sorted IL-4 positive and negative cells were stimulated for an additional 20 hours and rested, (see “Material and methods” of the main text). After 1 or 2 days in resting conditions, fractions of cells were re-stimulated with PMA/Ionomycin for 20 hours and IL-4 production was measured in the supernatant by ELISA. The sorted IL-4 positive cells produced significantly more IL-4 than the negative cells. Moreover, IL-4 production in the positive cells declined from day 1 to day 2 (loss of memory) whereas it remained similar in the negative fraction. One representative experiment out of two is shown.

**Supplementary Figure S11.** In *il4<sup>wt</sup>/il4<sup>gfp</sup>* Th2 cells, the expression of *il4<sup>gfp</sup>* allele is similar in cell populations previously sorted according to expression or non-expression of the *il4<sup>wt</sup>* allele.

1-week-differentiated *il4<sup>wt</sup>/il4<sup>gfp</sup>* Th2 cells were stimulated with anti-CD3/28 for 3.5 hours. Cells producing and not producing IL-4 from the *il4<sup>wt</sup>* allele were purified using IL-4 secretion assay (Material and Methods). Sorted IL-4 positive and negative cells were stimulated for an additional 20 hours and rested, as described in Fig. 4C and in Material and Methods. At day 1, day 2, and day 3 after stimulation, aliquots of sorted IL-4 positive (red line) and negative (blue line) cells were stimulated with PMA/ionomycin for 20 hours and measured with flow-cytometry. To check that GFP was expressed *de novo*, aliquots of cells were left unstimulated and measured, verifying that GFP was not continuously expressed (day

1 before stimulus), and any expression seen on subsequent days was due to the stimulation of the cells. GFP expression was similar in the sorted IL-4 producers and non-producers, sometimes with slightly higher GFP expression in the sorted IL-4 producers than in the non-producers (e.g., day 2). By comparison, expression of the *il4<sup>wt</sup>* allele was strongly enhanced in the sorted IL-4 producers, as shown for aliquots of cells stimulated on day 3 for 4 hours with PMA/ionomycin/BfA and stained for intracellular IL-4 (see also Figure S9). An independent repetition of this experiment also yielded similar or slightly elevated GFP expression in sorted IL-4 producers versus non-producers, as compared to the strong enrichment of the sorted IL-4 producers in expression of the *il4<sup>wt</sup>* allele.

**Supplementary Figure S12.** Sorted IL-4 positive and negative cells do not differ in proliferation rate.

1-week-differentiated *il4<sup>wt</sup>/il4<sup>gfp</sup>* Th2 cells were stimulated with anti-CD3/28 for 3.5 hours. IL-4 producing and non-producing cells were purified, using IL-4 secretion assay (see "Materials and Methods" in main text), labelled with DDAO. Sorted IL-4 positive and negative cells were stimulated for additional 20 hours and rested (see "Material and methods" of the main text). After 3 and 5 days of resting culture, DDAO fluorescence intensity were measured with flow-cytometry in both populations. As the cell divides, the two daughter cells have an halved fluorescence intensity of the DDAO marker, therefore the level of cell proliferation is inversely correlated with the level of DDAO (see "cell proliferation" arrow). Distribution of the proliferation marker DDAO in sorted IL-4 positive (red line) and negative (blue line) cells exhibit similar fluorescence profiles. As control, an unlabelled population treated with same conditions is presented (grey shadow). One representative experiment out of two is shown.

**Supplementary Figure S13.** Sorted IL-4 positive and negative populations exhibit similar up-regulation of Gata-3 expression.

1-week-differentiated  $il4^{wt}/il4^{gfp}$  Th2 cells were stimulated with anti-CD3/28 for 3.5 hours.

IL-4 producing (A) and non-producing (B) cells were purified with IL-4 secretion (see fig. S6) and stimulated for an additional 20 hours and rested (see “Material and methods” of the main text). After 5 days in resting conditions, Gata-3 was measured in sorted IL-4 positive (red line) and negative cultures (blue line). One representative experiment out of four is shown (two repetitions using heterozygous  $il4^{wt}/il4^{gfp}$  mice [7] and two repetitions wild-type mice ).

**Supplementary Figure S14.** Confidence intervals for the chromatin opening rate in 1-week- and 3-weeks-differentiated wild-type Th2 cells.

We used the same objective function  $F$ , as described in Fig. S4, and the same parameters (Table 1) to fit data from (A) 1-week- and (B) 3-weeks-differentiated wild-type Th2 cells with the model simulation, where the chromatin opening rate  $k_G$  was the unique free parameter. Profile-likelihood based method was used to compute the 95% confidence intervals of the chromatin opening rate  $k_G$  for the two sets of data.

**Supplementary Figure S15.** Correlation between positive fraction and mean protein level in case of monoallelic regulation.

The model considers a population of cells carrying two alleles of a certain gene. Upon stimulation, each allele activates its expression independently of the other one with probability rate  $\rho_1$  and a mean protein level  $P_1$ . The fraction of cells expressing one allele (dark grey area) is  $\rho_M = 2\rho_1(1 - \rho_1)$  with mean level  $P_1$ . The fraction expressing two alleles (light grey area) is  $\rho_B = \rho_1^2$  with mean level  $2P_1$ . The total  $\rho_T$  fraction of expressing cells (horizontal axis) is the sum of  $\rho_M + \rho_B = \rho_T = \rho_1(2 - \rho_1)$  and the mean protein level is  $P_T = P_1\rho_M + 2P_1\rho_B = 2\rho_1P_1$ . The mean protein level per expressing cell is  $P_+ = P_T / \rho_T = 2P_1(1 - \sqrt{1 - \rho_T}) / \rho_T$ . For a constant production  $P_1$  from each allele, an induction of  $\rho_T = 12\%$  of the population (arrow on 0.12) implies a mean protein level in the expressing fraction of  $P_+(12\%) = 1.03P_1$ , while an induction of  $\rho_T = 60\%$  (arrow on 0.6) implies a mean



protein level in the expressing fraction of  $P_+(60\%) = 1.22P_1$ . Compared to the basic value of a single allele  $P_1$ , the increases in the protein level  $(P_+ - P_1)/P_1$  (black dotted line) for the two fractions were of 3% and 22% respectively. Between these two production levels, the relative increase of the mean level was ~18%, as presented in the main text.

### Supplementary information references

1. Van Kampen NG (2004) Stochastic processes in physics and chemistry. Amsterdam: Elsevier. 465 S. p.
2. Thattai M, van Oudenaarden A (2001) Intrinsic noise in gene regulatory networks. Proc Natl Acad Sci U S A 98: 8614-8619.
3. Ozbudak EM, Thattai M, Kurtser I, Grossman AD, van Oudenaarden A (2002) Regulation of noise in the expression of a single gene. Nat Genet 31: 69-73.
4. Sigal A, Milo R, Cohen A, Geva-Zatorsky N, Klein Y, et al. (2006) Variability and memory of protein levels in human cells. Nature 444: 643-646.
5. Yarovinsky TO, Butler NS, Monick MM, Hunninghake GW (2006) Early exposure to IL-4 stabilizes IL-4 mRNA in CD4+ T cells via RNA-binding protein HuR. J Immunol 177: 4426-4435.
6. Verzon D, Moolgavkar SH (1988) An algorithm for computing profile-likelihood-based confidence intervals. Appl Stat 37: 87-94.
7. Hu-Li J, Pannetier C, Guo L, Lohning M, Gu H, et al. (2001) Regulation of expression of IL-4 alleles: analysis using a chimeric GFP/IL-4 gene. Immunity 14: 1-11.

**A**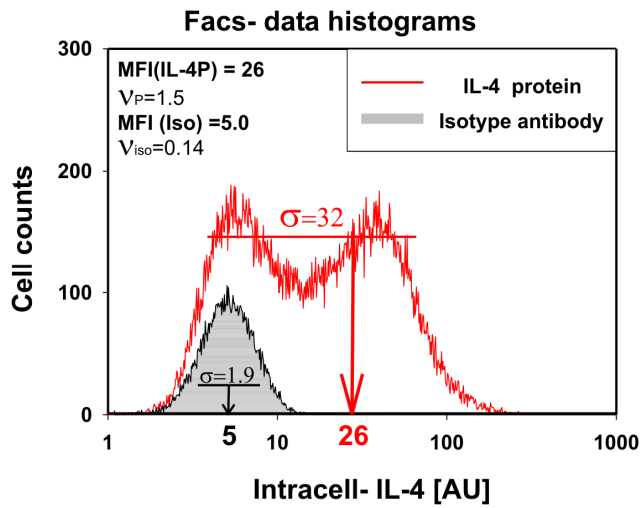**B**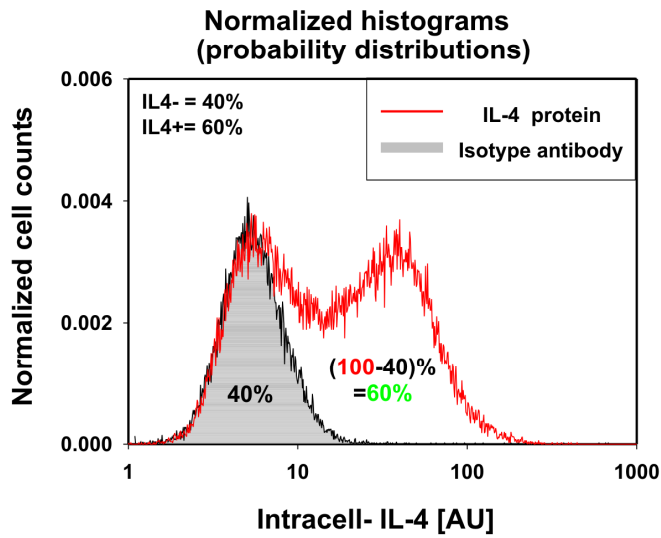**C**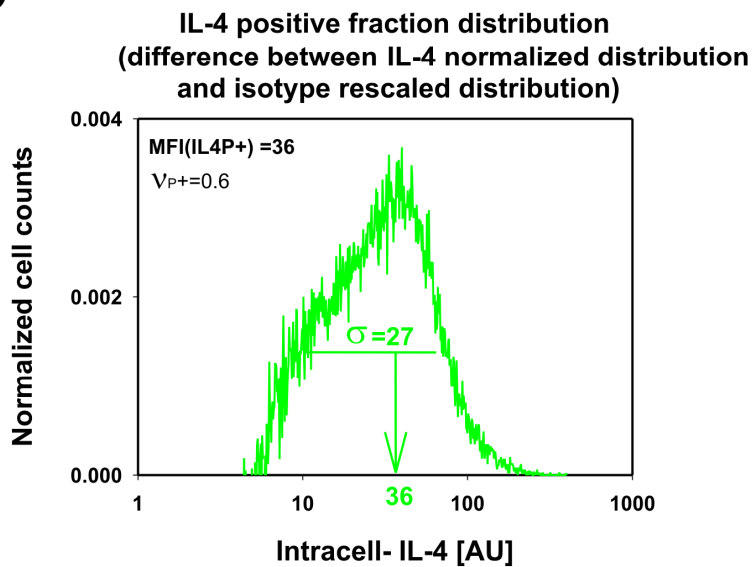**Figure S1**

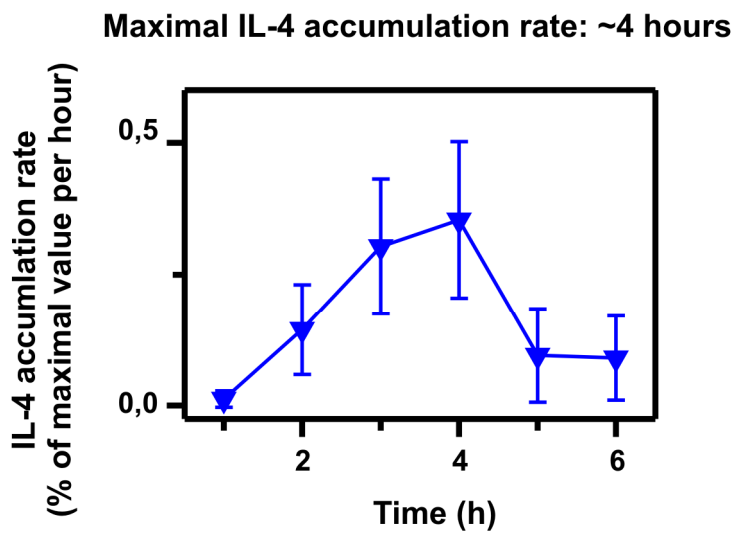

Figure S2

**A**

RNA average lifetime ~90 min  
in the range between (60,120)min

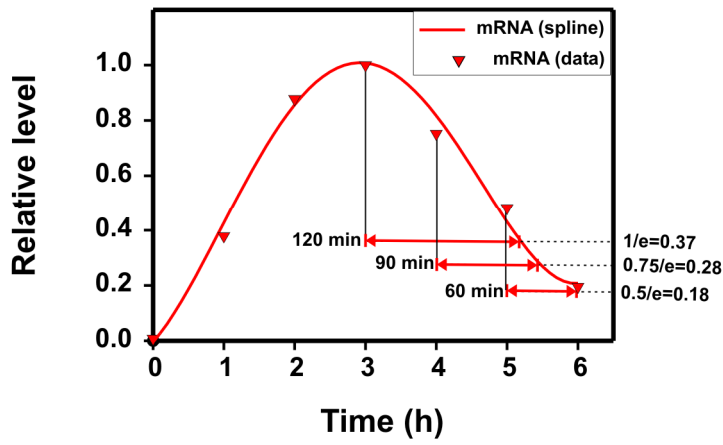**B**

Protein secretion rate ~ 1/(45 min)

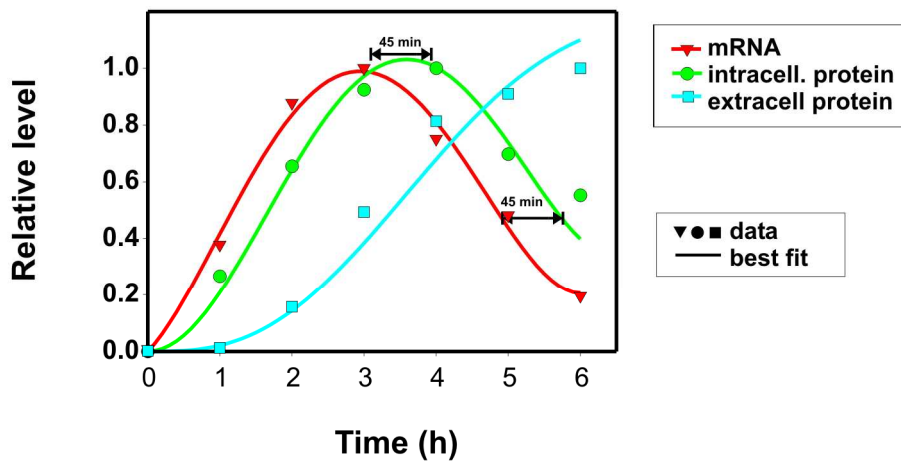

Figure S3

**A**

Best fit regions of  $k_G$  and  $t_A$   
determined from simulated annealing

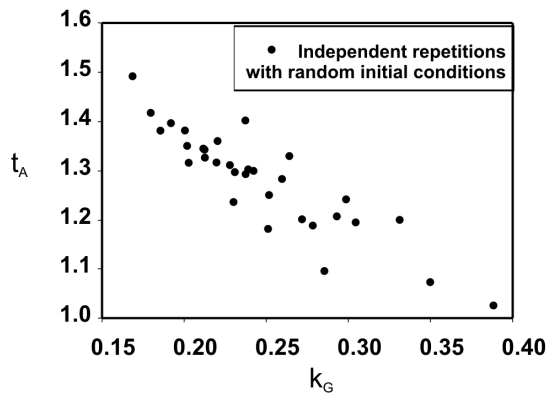**B**

Profile-likelihood method for  $k_G$  and  $t_A$   
around ( $k_G=0.23/h, t_A=1.3h, d_G=0.01/h$ )

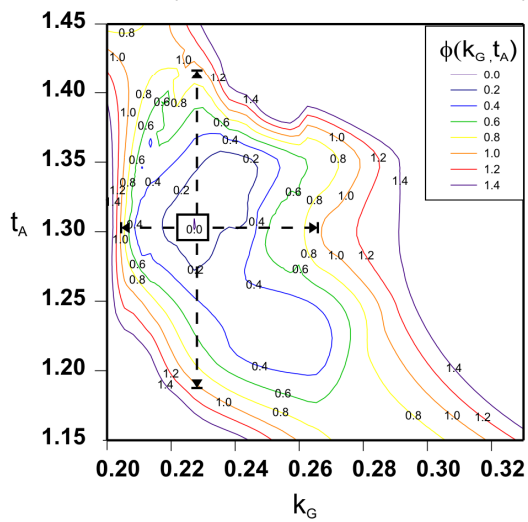**C**

Profile-likelihood method for  $d_G$   
around ( $k_G=0.23/h, t_A=1.3h, d_G=0.01/h$ )

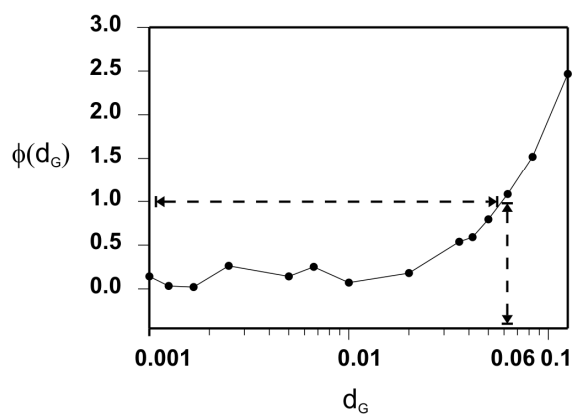

Figure S4

**A****Day3****Stimulated Th2 cells**

Corr.Coeff. &lt; 0.05

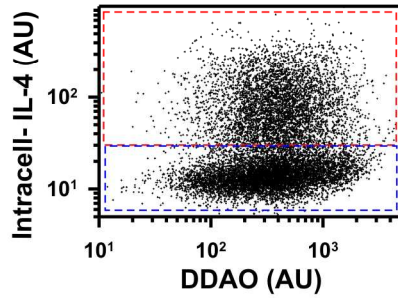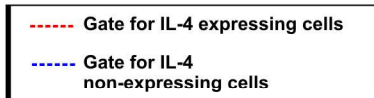**Proliferation marker distributions**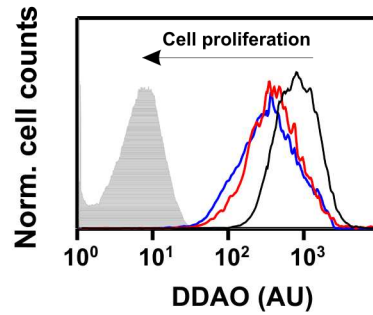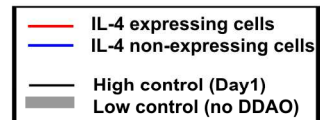**B****Day5****Stimulated Th2 cells**

Corr.Coeff. &lt; 0.05

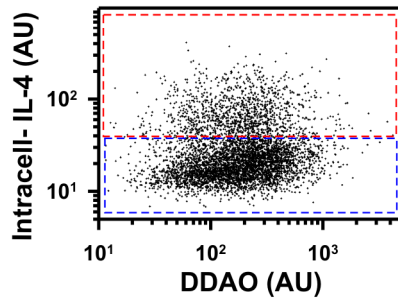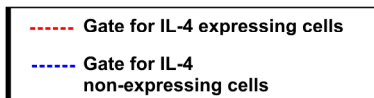**Proliferation marker distributions**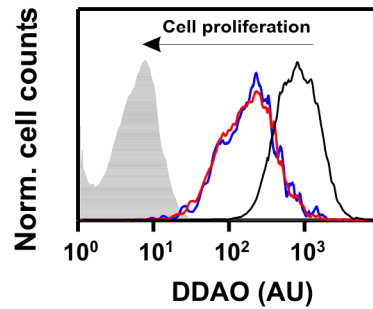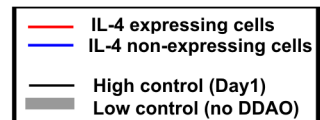**Figure S5**

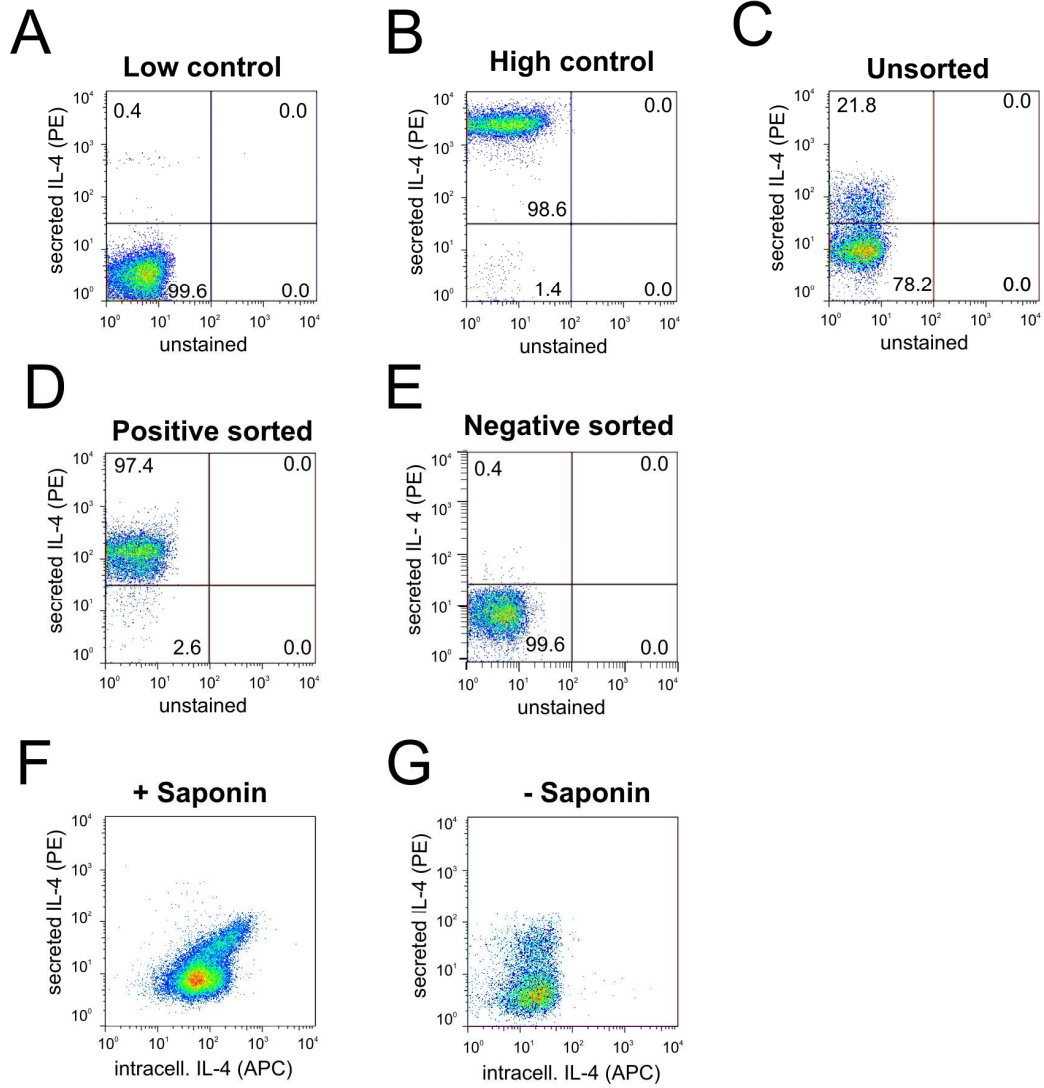

Figure S6

# Day0

(24hours after 1° stim.)

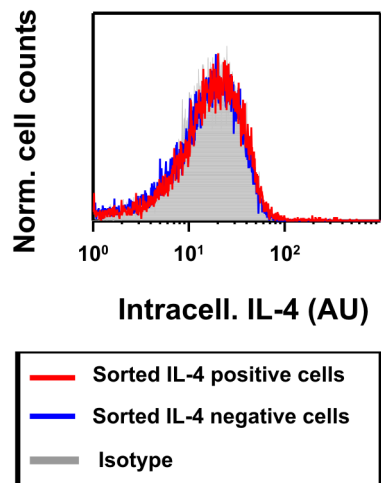

Figure S7



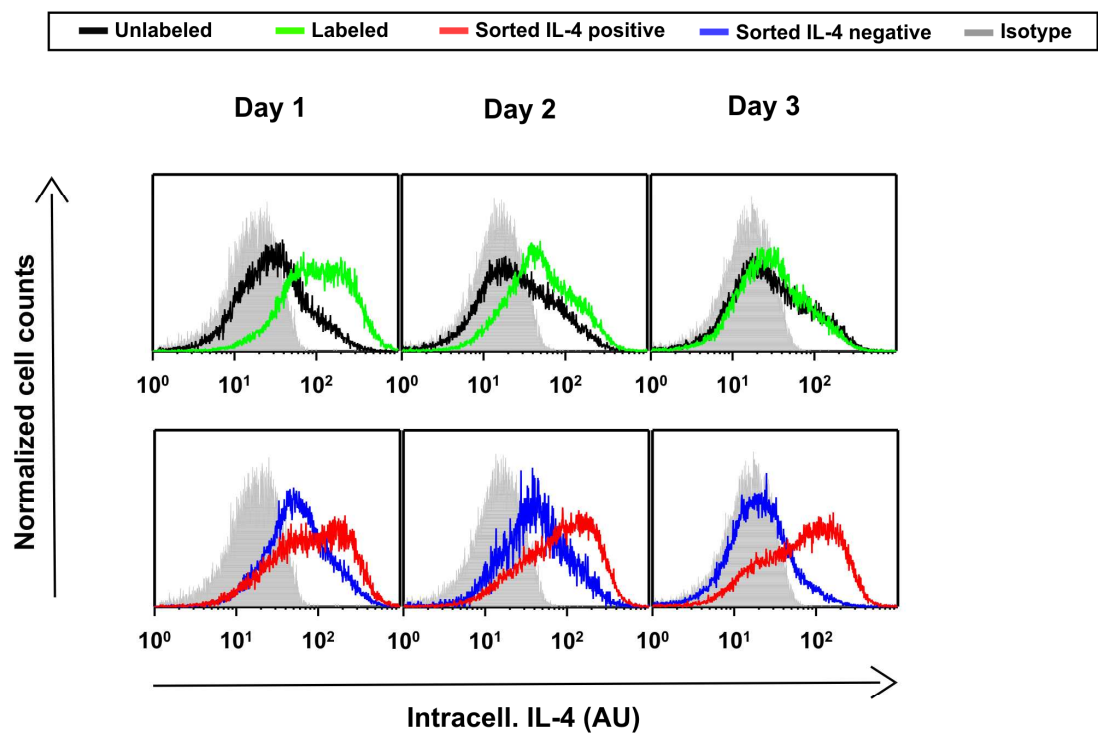

Figure S8

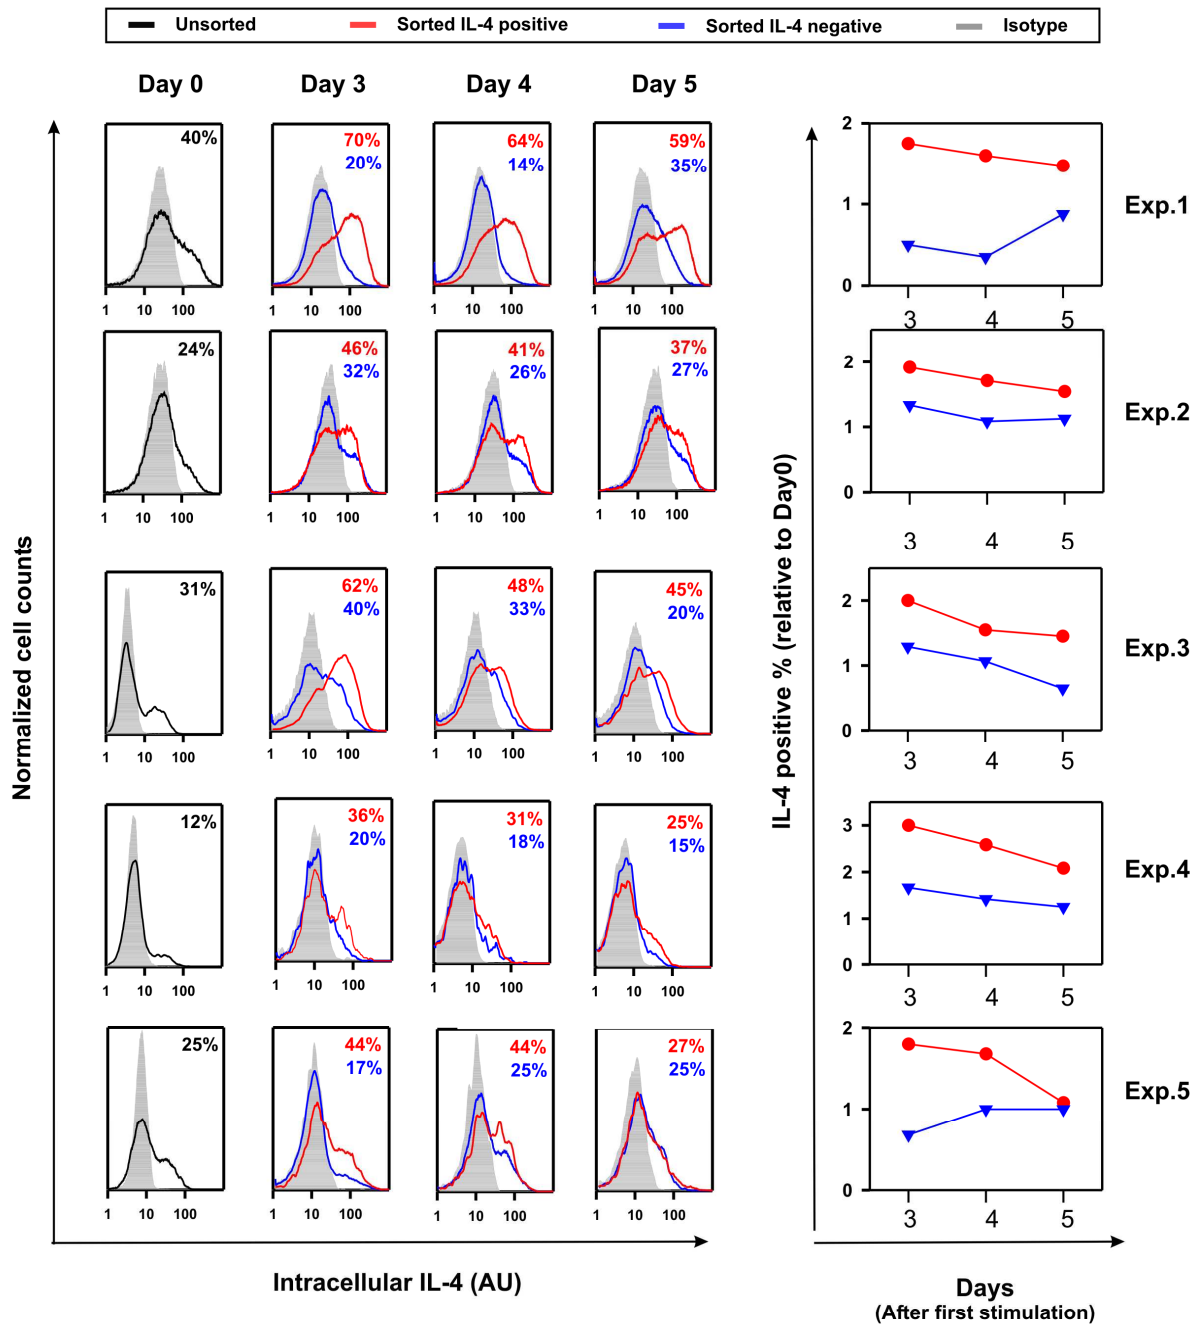

Figure S9

### IL-4 extracellular accumulation upon second stimulation

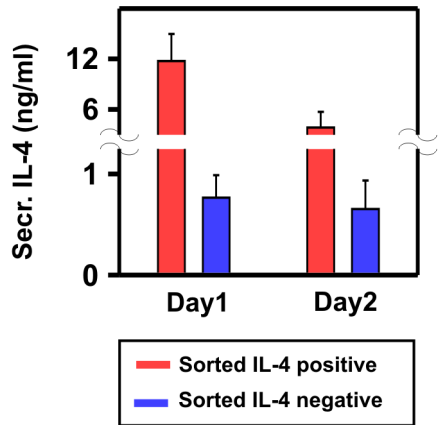

Figure S10

### GFP/IL-4 distributions after restimulation in IL-4 -sorted cells

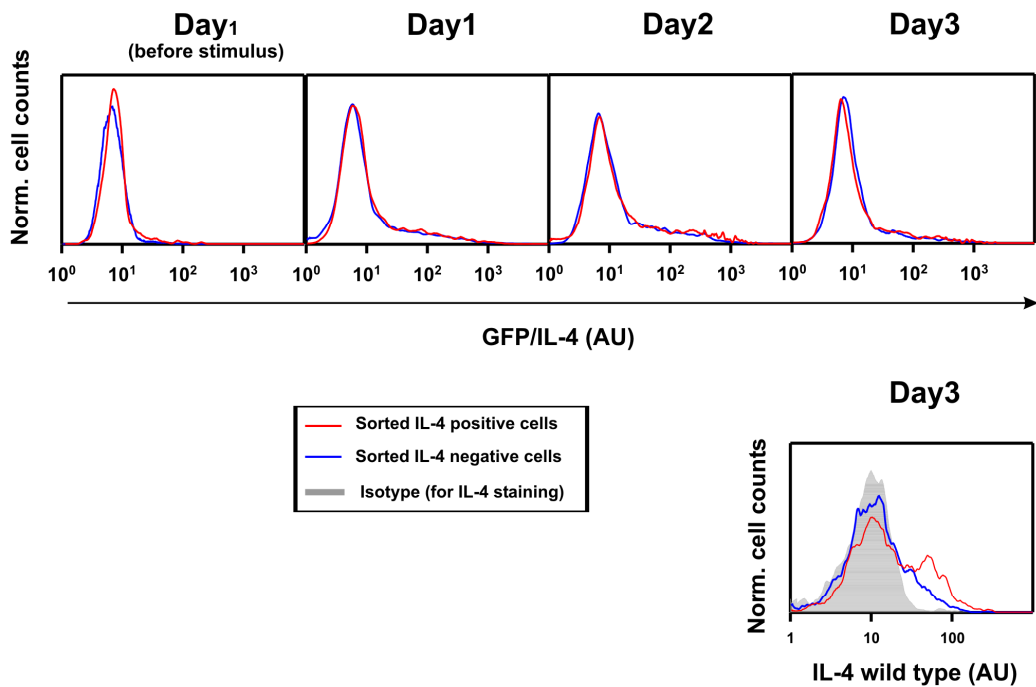

Figure S11

## Distributions of proliferation marker in IL-4-sorted cultures

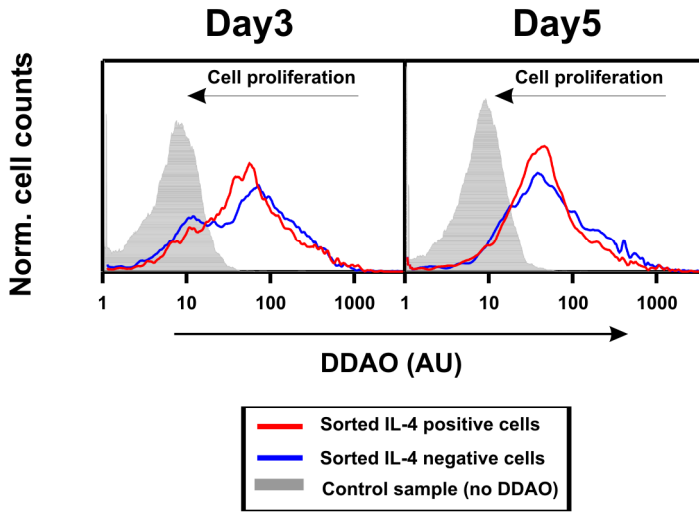

Figure S12

## Gata-3 levels at Day 5 after IL-4 sorting

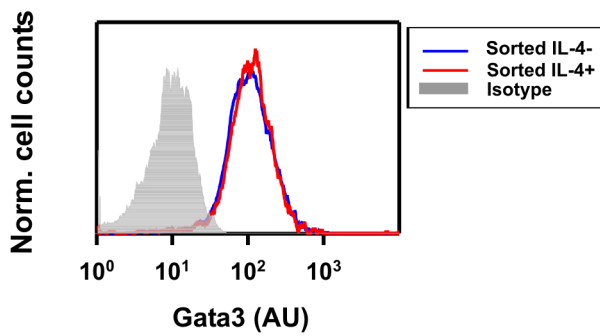

Figure S13

## Monoallelic and biallelic contribution to the mean protein production

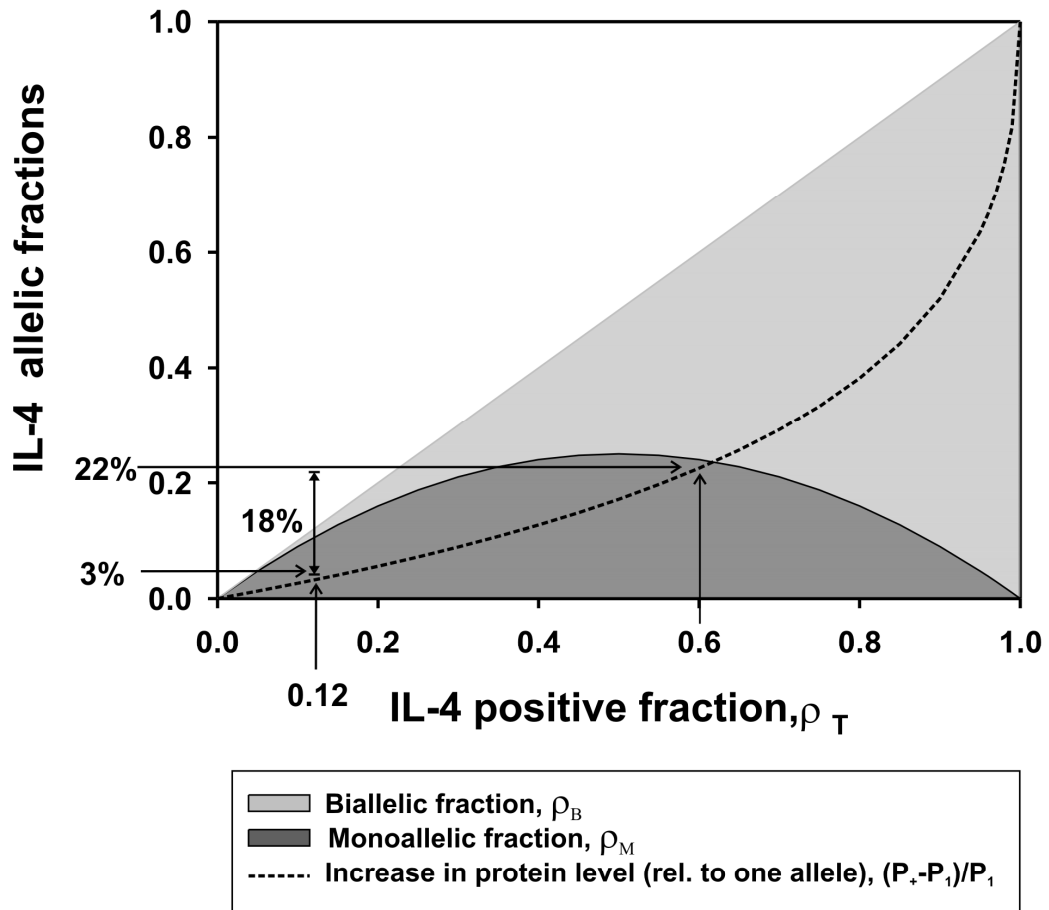

Figure S14

A

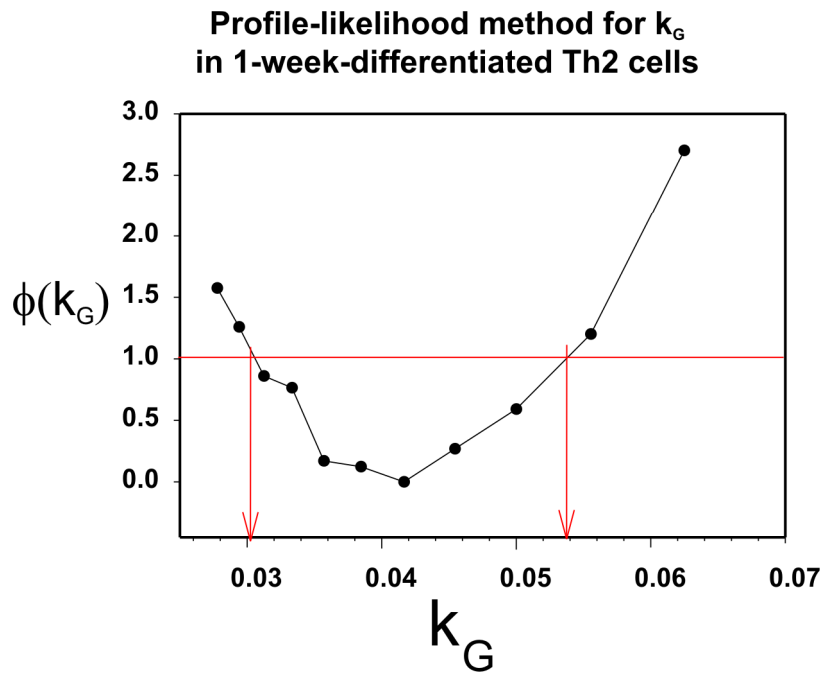

B

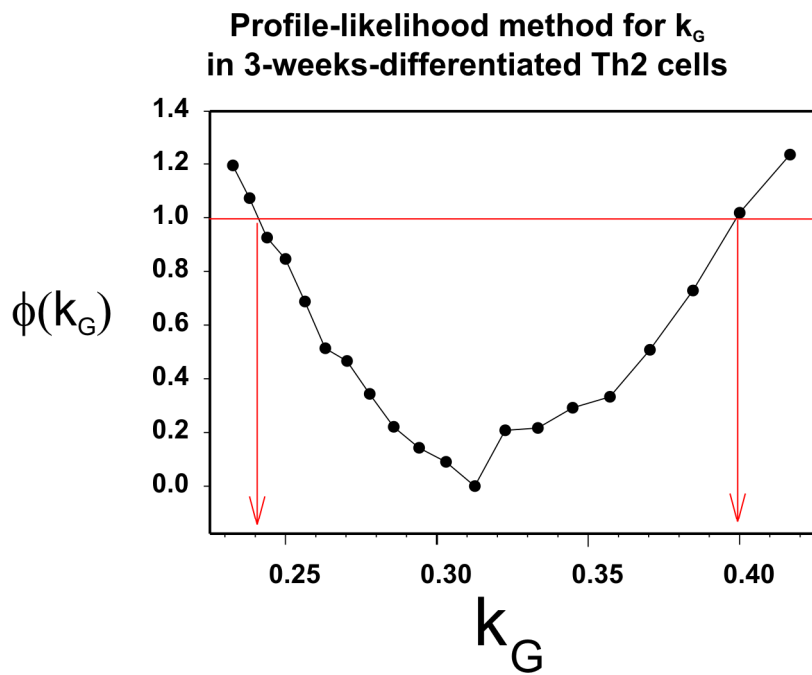

Figure S15
